# Supplementary material
Source: publisher site journal article supplement (https://www.dovepress.com/get_supplementary_file.php?f=466602.docx)
Supplement: Supplementary file 1 [file get_supplementary_file.php]

**Supplementary materials:**

**Appendix 1: Study survey**

**A) Demographic information**

1. How old are you? …………………….

2. What is your gender?

- Male
- Female

3. What is your highest level of education?

- Diploma
- Bachelors
- Master
- Doctorate

4. How many years have you worked as a physiotherapist?

- - 1-5 years
  - 6-10 years
  - 11-15 years
  - 16-20 years
  - More than 20 years

5. In which city of Saudi Arabia do you work as a physiotherapist? …………………..

6. What is your work sector?

- - Government
  - Private

7. Can you please write the name of your workplace? …………………………..(optional)

8. How many stroke patients do you manage per week?

- - 1-10 patients
  - 11-20 patients
  - 21-30 patients
  - 31-40 patients
  - 41-50 patients
  - More than 50 patients

**B) The usage of standardized outcome measures**

Which of the following outcome measures you used in clinical practice?

| **Name of the scale** | **I don’t know the scale** | **I don’t use it** | **I use it in Acute stage** | **I use it in Chronic stage** | **I use it in all stroke stage** |
| --- | --- | --- | --- | --- | --- |
| 1. Five Times Sit-to-Stand Test |  |  |  |  |  |
| 1. Six-Minute-Walk Test |  |  |  |  |  |
| 1. 9-Hole Peg Test |  |  |  |  |  |
| 1. 10-Meter Walk Test |  |  |  |  |  |
| 1. Ashworth scale |  |  |  |  |  |
| 1. Berg Balance Scale |  |  |  |  |  |
| 1. Box & Blocks Test |  |  |  |  |  |
| 1. Dynamic Gait Index (DGI) |  |  |  |  |  |
| 1. Fugl-Meyer Assessment of Motor Performance–Lower Extremity Subscale |  |  |  |  |  |
| 1. Fugl-Meyer Assessment of Motor Performance–Upper Extremity Subscale |  |  |  |  |  |
| 1. Functional Independence Measure (FIM) |  |  |  |  |  |
| 1. Functional Reach Test |  |  |  |  |  |
| 1. Motor Activity Log |  |  |  |  |  |
| 1. Postural Assessment Scale for Stroke Patients |  |  |  |  |  |
| 1. Stroke Rehabilitation Assessment of Movement–Mobility Subscale (STREAM) |  |  |  |  |  |
| 1. Stroke Rehabilitation Assessment of Movement–Limb Subscales (STREAM) |  |  |  |  |  |
| 1. Tardieu Spasticity Scale |  |  |  |  |  |
| 1. Timed “Up & Go” Test (TUG) |  |  |  |  |  |
| 1. Trunk Impairment Scale |  |  |  |  |  |
| 1. Wolf Motor Function Test |  |  |  |  |  |

1. Did you use any of the standardized outcome measures that not listed?

- Yes
- No

2. If yes, please list the standardized outcome measure being used

______________________________________________________________________________________________________________________________________________________

3. Are there any recommended standardized outcome measures in your work area for the rehabilitation of stroke patients?

- Yes
- No

4. If yes, please list the standardized outcome measures being used

______________________________________________________________________________________________________________________________________________________

**C) To what extent do you agree with the following statements:**

| **Statement** | **Strongly agree** | **Agree** | **neutral** | **Disagree** | **Strongly disagree** |
| --- | --- | --- | --- | --- | --- |
| I know the Standardized Outcome Measures recommended by the clinical practice guidelines (such as APTA) for individuals with stroke |  |  |  |  |  |
| I have sufficient knowledge to use Standardized Outcome Measures. |  |  |  |  |  |
| I have a positive attitude towards the use of standardized outcome measures |  |  |  |  |  |
| The use of Standardized Outcome Measures is too time-consuming |  |  |  |  |  |
| The use of Standardized Outcome Measures is a waste of patient time |  |  |  |  |  |
| I am trained to use outcome measures correctly |  |  |  |  |  |
| I have experience with outcome measures |  |  |  |  |  |
| My fellow physiotherapists cooperate in applying outcome measures. |  |  |  |  |  |
| My supervisor/manager(s) cooperate(s) in applying outcome measures |  |  |  |  |  |
| Standerdised outcome measures helped me in clinical decision making |  |  |  |  |  |
| There is a risk that the use of outcome measures will be used for disciplinary actions against physiotherapists |  |  |  |  |  |
| The limited resources (i.e., availability of equipments) hinder me from using Standardized Outcome Measures |  |  |  |  |  |
| Outcome measures fit in with my daily practice routine. |  |  |  |  |  |
| I’m willing to use the Standardized Outcome Measures in my daily practice routine |  |  |  |  |  |
| The use of Standardized Outcome Measures improved communication between patients and therapists |  |  |  |  |  |

1. Are you interested to be invited in another research relevant to the stroke rehabilitation?

- Yes
- No

2. If yes, kindly provide your contact information below (phone number or email address)

**Appendix 2: Flowchart of study enrolment**

Excluded – did not meet inclusion criteria (n = 348)

- They did not manage patient with stroke
- Working in countries other than Saudi Arabia

Participants included in the analysis

n = 138

Removed from analysis due to repeated response submission to the survey (n = 11)

Participants who met inclusion criteria

n = 149

Participants who invited to the study by SCFHS

n = 742

Participants who accessed the survey from email invitation

n = 497

**Appendix 3: Standardized outcome measures used in clinical practice that were not included in the study's questionnaire.**

| **Outcome measure** | **Number of participants used the outcome measure** |
| --- | --- |
| Foot Function Index (FFI) | 2 |
| Function in Seating Test (FIST) | 1 |
| Activities-specific Balance Confidence (ABC) Scale | 1 |
| Morse Fall Scale (MFS) | 1 |
| Performance oriented Mobility Assessment (POMA) | 1 |
| Voluntary Control Grading (VCG) | 1 |
| Trunk Control Test (TCT) | 2 |
| Borg Rating of Perceived Exertion (RPE) | 1 |
| National Institutes of Health Stroke Scale (NIHSS) | 1 |
| Reintegration to Normal Living Index (RNLI) | 1 |
| Barthel Index (BI) | 2 |
